# Supplementary material for: Evaluating epidemic forecasts in an interval format
Source: PubMed Central journal article supplement (PMC7880475; doi:10.1371/journal.pcbi.1008618), 2021-02-12
Supplement: pcbi.1008618.s001.pdf [file pcbi.1008618.s001.pdf]

# Supplement (S1 Text) for “Evaluating epidemic forecasts in an interval format”

Johannes Bracher<sup>1,2</sup>, Evan L. Ray<sup>3</sup>, Tilmann Gneiting<sup>2,4</sup> and Nicholas G. Reich<sup>3</sup>

<sup>1</sup>Karlsruhe Institute of Technology (KIT), Chair of Econometrics and Statistics

<sup>2</sup>Heidelberg Institute for Theoretical Studies

<sup>3</sup>University of Massachusetts, School of Public Health and Health Sciences, Department of Biostatistics and Epidemiology

<sup>4</sup>Karlsruhe Institute of Technology (KIT), Institute for Stochastics

January 13, 2021

## 1 Relationship between quantile score, interval score and CRPS

The standard piecewise linear quantile score [1, 2] for the level  $\tau$  is defined as

$$\text{QS}_\tau(F, y) = 2 \times \{\mathbf{1}(y \leq q_\tau) - \tau\} \times (q_\tau - y),$$

where  $q_\tau$  is the  $\tau$  quantile of the forecast  $F$  and  $y$  is the observed outcome. It can be shown by some re-ordering of terms that the interval score of a central  $(1 - \alpha)$  PI can be computed from the quantile scores at levels  $\alpha/2$  and  $1 - \alpha/2$  as

$$\text{IS}_\alpha(F, Y) = \frac{\text{QS}_{\alpha/2}(F, y) + \text{QS}_{1-\alpha/2}(F, y)}{\alpha}. \quad (\text{S.1})$$

Interestingly, this is the only available proper interval score that is invariant under translation [3, Theorem 4], so that for a prediction horizon of one time unit, evaluations in terms of incident counts yield the same results as evaluations in terms of cumulative counts.

Moreover it is known [4, 5] that

$$\begin{aligned} \text{CRPS}(F, y) &= \int_0^1 \text{QS}_\tau(F, y) \, d\tau, \\ &\approx \frac{1}{2K+1} \times \sum_{k=1}^{2K+1} \text{QS}_{\tau_k}(F, y), \\ &= \frac{1}{2K+1} \times \sum_{k=1}^{2K+1} 2 \times \{\mathbf{1}(y \leq q_{\tau_k}) - \tau_k\} \times (q_{\tau_k} - y), \end{aligned} \quad (\text{S.2})$$

with a large number of (approximately) equally spaced levels  $\tau_k$  stretching the unit interval such that  $\tau_1 < \dots < \tau_{K+1} = 1/2 < \dots < \tau_{2K+1}$ . Note that expression (S.2) is the same as the alternative expression (4) for the WIS from the main text, where  $\tau_k = \alpha_k/2$  and  $\tau_{2K+2-k} = 1 - \alpha_k/2$  for  $k = 1, \dots, K$ .

Indeed, starting from the original definition of the WIS in equation (1) with weights  $w_0 = 1/2$  and  $w_k = \alpha_k/2$  for  $k = 1, \dots, K$  as in equation (2) from the main text, using equation (S.1),

and noting that  $\tau_{K+1} = 1/2$  and  $q_{\tau_{K+1}} = m$  is the median, we see that

$$\begin{aligned} \text{WIS}_{\alpha_{0:K}}(F, y) &= \frac{1}{2K+1} \times \left( |y - m| + \sum_{k=1}^K \alpha_k \times \text{IS}_{\alpha_k}(F, y) \right) \\ &= \frac{1}{2K+1} \left( \text{QS}_{\tau_{K+1}}(F, y) + \sum_{k=1}^K \left\{ \text{QS}_{\tau_k}(F, y) + \text{QS}_{\tau_{2K+2-k}}(F, y) \right\} \right) \\ &= \frac{1}{2K+1} \times \sum_{k=1}^{2K+1} 2 \times \{ \mathbf{1}(y \leq q_{\tau_k}) - \tau_k \} \times (q_{\tau_k} - y). \end{aligned}$$

As noted in Section 2.2, the  $\tau_k$  we use in practice are not equally spaced in the tails (due to the addition of the quantiles at levels 0.01, 0.025, 0.975, and 0.99 forming the 95% and 98% prediction intervals). Relative to the CRPS, we thus put slightly more weight on the tails.

## References

1. Gneiting T, Raftery AE. Strictly proper scoring rules, prediction, and estimation. *Journal of the American Statistical Association*. 2007;102(477):359–378. doi:10.1198/016214506000001437.
2. Gneiting T. Making and evaluating point forecasts. *Journal of the American Statistical Association*. 2011;106(494):746–762. doi:10.1198/jasa.2011.r10138.
3. Brehmer JR, Gneiting T. Scoring interval forecasts: Equal-tailed, shortest, and modal interval. *Bernoulli*. 2021; forthcoming. Preprint available at <https://arxiv.org/abs/2007.05709>.
4. Laio F, Tamea S. Verification tools for probabilistic forecasts of continuous hydrological variables. *Hydrology and Earth System Sciences Discussions*. 2007;11(4):1267–1277. doi:10.5194/hess-11-1267-2007
5. Gneiting T, Ranjan R. Comparing density forecasts using threshold- and quantile-weighted scoring rules. *Journal of Business and Economic Statistics*. 2011;29(3):411–422. doi:10.1198/jbes.2010.08110
